# Supplementary material for: Discovery of new therapeutic targets in ovarian cancer through identifying significantly non-mutated genes
Source: Springer Nature journal article supplement (doi:10.1186/s12967-022-03440-5), 2022-05-26
Supplement: MOESM1 [file 23085066]

a

| TOP 20 GENES WITH OBSERVED MUTATION FREQUENCIES LOWER THAN RANDOM EXPECTATION |           |                          |               |                |                                                                                |
|-------------------------------------------------------------------------------|-----------|--------------------------|---------------|----------------|--------------------------------------------------------------------------------|
|                                                                               | Gene Name | Ratio Observed/Simulated | Observed Rank | Simulated Rank | Annotation                                                                     |
| 1                                                                             | TRAPPC9   | 0.07                     | 5891          | 2              | trafficking protein particle complex 9                                         |
| 2                                                                             | LPP       | 0.11                     | 3611          | 11             | LIM domain containing preferred translocation partner in lipoma                |
| 3                                                                             | ELFN2     | 0.12                     | 4446          | 13             | extracellular leucine-rich repeat and fibronectin type III domain containing 2 |
| 4                                                                             | ANKLE2    | 0.13                     | 3107          | 16             | ankyrin repeat and LEM domain containing 2                                     |
| 5                                                                             | SHROOM3   | 0.14                     | 4931          | 28             | shroom family member 3                                                         |
| 6                                                                             | PGR       | 0.14                     | 3798          | 27             | progesterone receptor                                                          |
| 7                                                                             | MAP1B     | 0.15                     | 6400          | 39             | microtubule-associated protein 1B                                              |
| 8                                                                             | OBSL1     | 0.15                     | 5649          | 38             | obscurin-like 1                                                                |
| 9                                                                             | CELSR1    | 0.15                     | 6483          | 57             | cadherin, EGF LAG seven-pass G-type receptor 1 (flamingo homolog, Drosophila)  |
| 10                                                                            | DBNL      | 0.16                     | 5544          | 50             | drebrin-like                                                                   |
| 11                                                                            | PHF21A    | 0.16                     | 3552          | 36             | PHD finger protein 21A                                                         |
| 12                                                                            | TRPV6     | 0.16                     | 5245          | 48             | transient receptor potential cation channel, subfamily V, member 6             |
| 13                                                                            | VEGFA     | 0.16                     | 4406          | 47             | vascular endothelial growth factor A                                           |
| 14                                                                            | GRIP2     | 0.17                     | 3298          | 51             | glutamate receptor interacting protein 2                                       |
| 15                                                                            | RALGDS    | 0.17                     | 4874          | 61             | ral guanine nucleotide dissociation stimulator                                 |
| 16                                                                            | CCDC144A  | 0.17                     | 4302          | 58             | coiled-coil domain containing 144A                                             |
| 17                                                                            | RAI1      | 0.17                     | 3399          | 55             | retinoic acid induced 1                                                        |
| 18                                                                            | TBC1D2B   | 0.17                     | 3106          | 52             | TBC1 domain family, member 2B                                                  |
| 19                                                                            | SMG1      | 0.17                     | 5523          | 82             | smg-1 homolog, phosphatidylinositol 3-kinase-related kinase (C. elegans)       |
| 20                                                                            | BRWD1     | 0.18                     | 4873          | 85             | bromodomain and WD repeat domain containing 1                                  |

b

| TOP 20 GENES WITH OBSERVED MUTATION FREQUENCIES HIGHER THAN RANDOM EXPECTATION |           |                          |               |                |                                                                   |
|--------------------------------------------------------------------------------|-----------|--------------------------|---------------|----------------|-------------------------------------------------------------------|
| #                                                                              | Gene Name | Ratio Observed/Simulated | Observed Rank | Simulated Rank | Annotation                                                        |
| 1                                                                              | TP53      | 271.9                    | 1             | 3426           | p53 tumor suppressor                                              |
| 2                                                                              | MMP8      | 93.3                     | 408           | 6505           | matrix metalloproteinase 8                                        |
| 3                                                                              | ANO4      | 76.5                     | 509           | 6501           | anoctamin 4, may act as a calcium-activated chloride channel      |
| 4                                                                              | PAK3      | 65.4                     | 537           | 6493           | p21 protein (Cdc42/Rac)-activated kinase 3                        |
| 5                                                                              | SPINK5    | 58.6                     | 1632          | 6507           | serine peptidase inhibitor, Kazal type 5                          |
| 6                                                                              | SDC2      | 56.6                     | 2490          | 6508           | cell surface-associated heparan sulfate proteoglycan 1            |
| 7                                                                              | MYBPC2    | 56.3                     | 652           | 6479           | myosin binding protein C, fast type                               |
| 8                                                                              | OVCH1     | 47.3                     | 338           | 6425           | ovochymase 1                                                      |
| 9                                                                              | MST4      | 46.8                     | 1663          | 6504           | serine/threonine protein kinase, may function in apoptosis        |
| 10                                                                             | PNLIP     | 45.6                     | 2301          | 6502           | pancreatic lipase                                                 |
| 11                                                                             | ACADSB    | 44.9                     | 2676          | 6506           | acyl-CoA dehydrogenase, short/branched chain                      |
| 12                                                                             | NCAM2     | 44.2                     | 708           | 6459           | neural cell adhesion molecule 2                                   |
| 13                                                                             | ALDH1A1   | 42.7                     | 1123          | 6491           | aldehyde dehydrogenase 1                                          |
| 14                                                                             | ATP8A2    | 41.8                     | 484           | 6451           | ATPase, aminophospholipid transporter, class I, type 8A, member 2 |
| 15                                                                             | EFR3A     | 38.9                     | 796           | 6471           | EFR3 homolog A, function not well-defined                         |
| 16                                                                             | UBLCP1    | 38.4                     | 4365          | 6509           | ubiquitin-like domain containing CTD phosphatase 1                |
| 17                                                                             | CELA2A    | 32.1                     | 2640          | 6497           | chymotrypsin-like elastase family, member 2A                      |
| 18                                                                             | ANXA7     | 29.1                     | 1771          | 6490           | annexin-7                                                         |
| 19                                                                             | LTV1      | 28.4                     | 2356          | 6482           | LTV1 homolog, involved in export of ribosomal subunits            |
| 20                                                                             | IFLTD1    | 28.4                     | 2390          | 6485           | intermediate filament tail domain containing 1                    |

**Table S1:** Top 20 genes mutated less (a) and more (b) than random expectation by ratio of observed/simulated. The ratio is calculated as the average of multiple simulation runs. The rank is from the most mutated to the least mutated. For example, TP53 is the most frequently mutated gene in observed data while TRAPPC9 is the second most frequently mutated in the simulated data. VEGFA is in green font and TP53 is in red font.

| ID | Molecules in Network                                                                                                                                                                                                                                                                                                                                                                                                                                                                  | Score | Focus Molecules | Top Diseases and Functions                                                              |
|----|---------------------------------------------------------------------------------------------------------------------------------------------------------------------------------------------------------------------------------------------------------------------------------------------------------------------------------------------------------------------------------------------------------------------------------------------------------------------------------------|-------|-----------------|-----------------------------------------------------------------------------------------|
| 1  | Actin, <b>AKAP13</b> , Akt, <b>BCR</b> , CG, Collagen type I (complex), Creb, Cyclin A, <b>EEF1D</b> , EIF3B, estrogen receptor, Fibrinogen, <b>FN1</b> , FSH, <b>GRIP2</b> , Hif1, <b>ICE2</b> , Ige, <b>MAP1B</b> , Pdgf (complex), <b>PGR</b> , <b>PHF21A</b> , Plk, PLC, <b>PLCH2</b> , <b>PTPRB</b> , Rac, <b>RALGDS</b> , Rap1, RNA polymerase II, RPS6KA, <b>SLC12A1</b> , <b>SMG1</b> , <b>TRPV6</b> , <b>VEGFA</b>                                                           | 40    | 17              | Cancer, Organismal Injury and Abnormalities, Skeletal and Muscular Disorders            |
| 2  | Ap1, <b>ARHGAP29</b> , <b>ARL10</b> , <b>ATXN2</b> , <b>BAHCC1</b> , CD3, <b>DBNL</b> , ERK1/2, F Actin, Focal adhesion kinase, Histone h2a, Histone h3, Histone h4, Hsp90, Immunoglobulin, Insulin, Jnk, <b>KDM2B</b> , <b>LIMD1</b> , <b>LPP</b> , <b>MACROH2A1</b> , Mapk, Mek, NFB (complex), P38 MAPK, PI3K (complex), Pkc(s), RAS, Ras homolog, Sfk, <b>SHROOM3</b> , SRC (family), <b>TRAPPC9</b> , Vegf, <b>ZNF451</b>                                                        | 26    | 12              | Cellular Assembly and Organization, Connective Tissue Disorders, Developmental Disorder |
| 3  | <b>ANKLE2</b> , ANKRD12, BSG, <b>BTBD7</b> , <b>CCDC144A</b> , CTDSP2, <b>ELFN2</b> , FAM162A, GRAMD1B, GREB1, KANK4, MAML3, <b>MCM9</b> , miR-12183-5p (and other miRNAs w/seed CUUCUUC), miR-324-3p (miRNAs w/seed CCACUGC), miR-6801-3p (and other miRNAs w/seed CCCCUGC), NCOA3, NUDT11, PRAG1, RAB11FIP4, <b>RAI1</b> , RFXANK, <b>SHROOM3</b> , <b>SLC12A9</b> , SLC45A4, SNX16, TBC1D1, <b>TBC1D2B</b> , <b>TBR1</b> , <b>TLL3</b> , URB2, UTP20, VIRMA, ZFYVE9, <b>ZNF646</b> | 26    | 12              | Cancer, Organismal Injury and Abnormalities, Renal and Urological Disease               |
| 4  | 75 NGF, <b>BRWD1</b> , <b>CELSR1</b> , <b>CHD2</b> , DHX29, DNAAF1, ESR1, GGNBP2, H19, H3C13, H4C2, HDAC1, HOTAIR, <b>L3MBTL1</b> , Macf1, <b>MAP3K9</b> , mir-140, mir-322, MYC, NR3C1, <b>OBSL1</b> , POU5F1, PRDM11, <b>RBM33</b> , <b>SHROOM3</b> , SON, TESMIN, TFB1M, Top2, <b>TOR1AIP2</b> , TP53, TRAP/Media, <b>WDR33</b> , <b>WDR6</b> , WDR75                                                                                                                              | 23    | 11              | Cell Cycle, Cell Morphology, Hair and Skin Development and Function                     |

**b Pathway diagram of network 3**

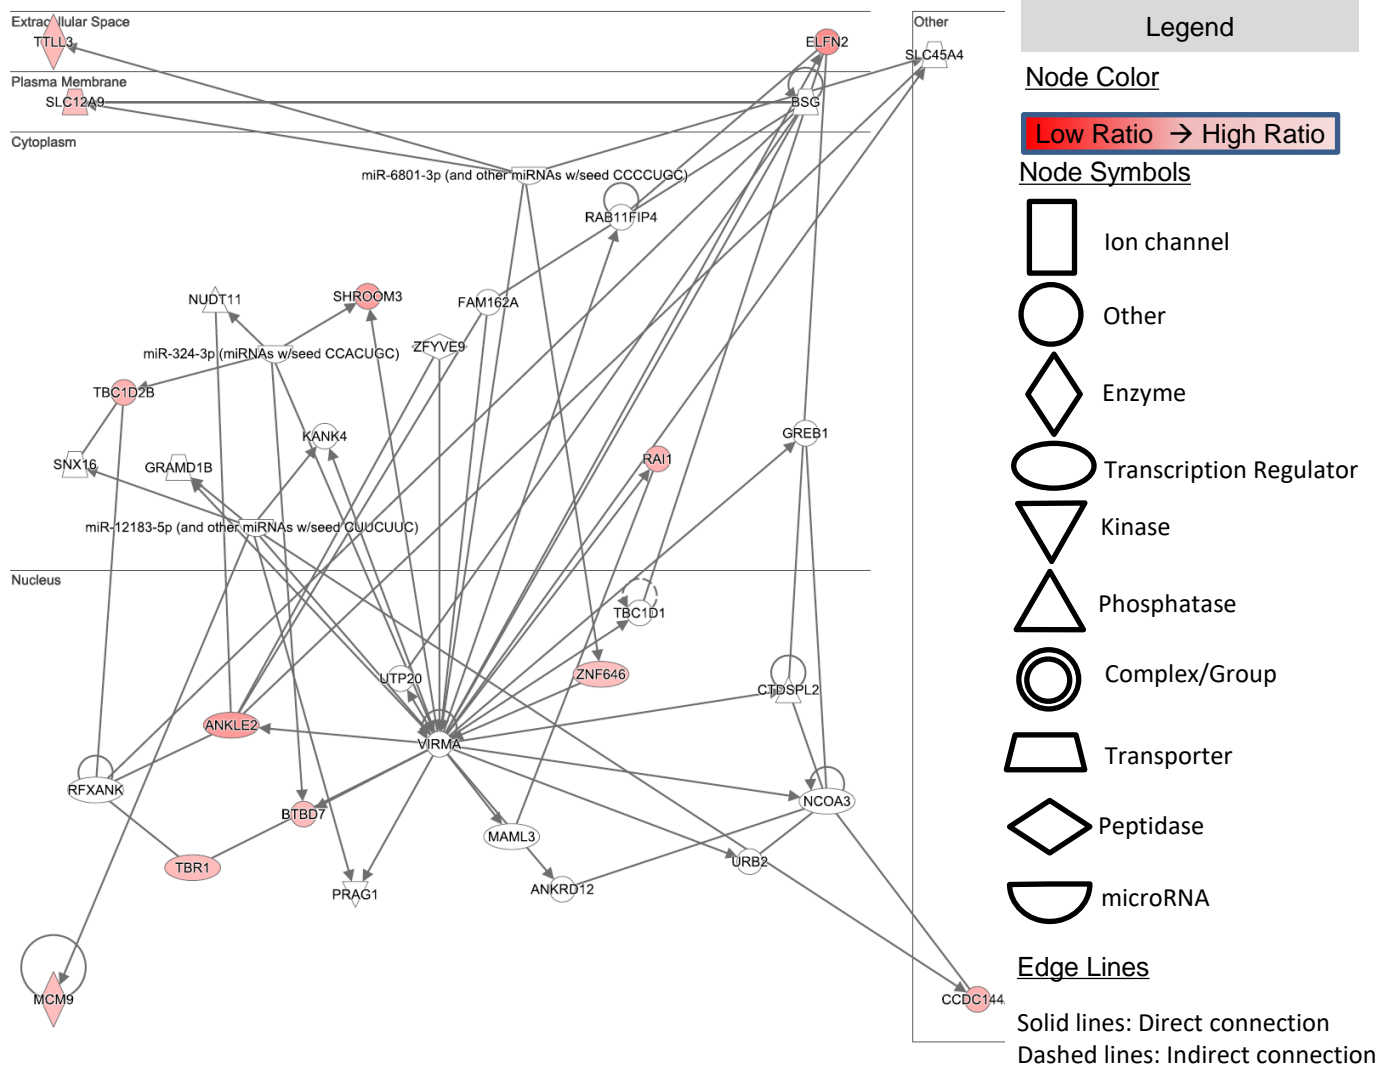

**Figure S1:** Automatically Generated IPA Pathways of the top 50 non-mutated genes. a) Four networks with IDs 1 to 4 (column 1) sorted by score were generated by IPA consisting of non-mutated genes and additional genes. The molecules in the network are provided in column 2 with the non-mutated genes indicated in BOLD with a downward pointing red arrow. The significance score is shown in column 3. The number of non-mutated genes in each pathway are in column 4 (Focus molecules). The IPA designated disease or function is shown in column 5. b) IPA generated visualization of network 3 containing ANKLE2 and other non-mutated genes.

Gene Expression (RPKM)

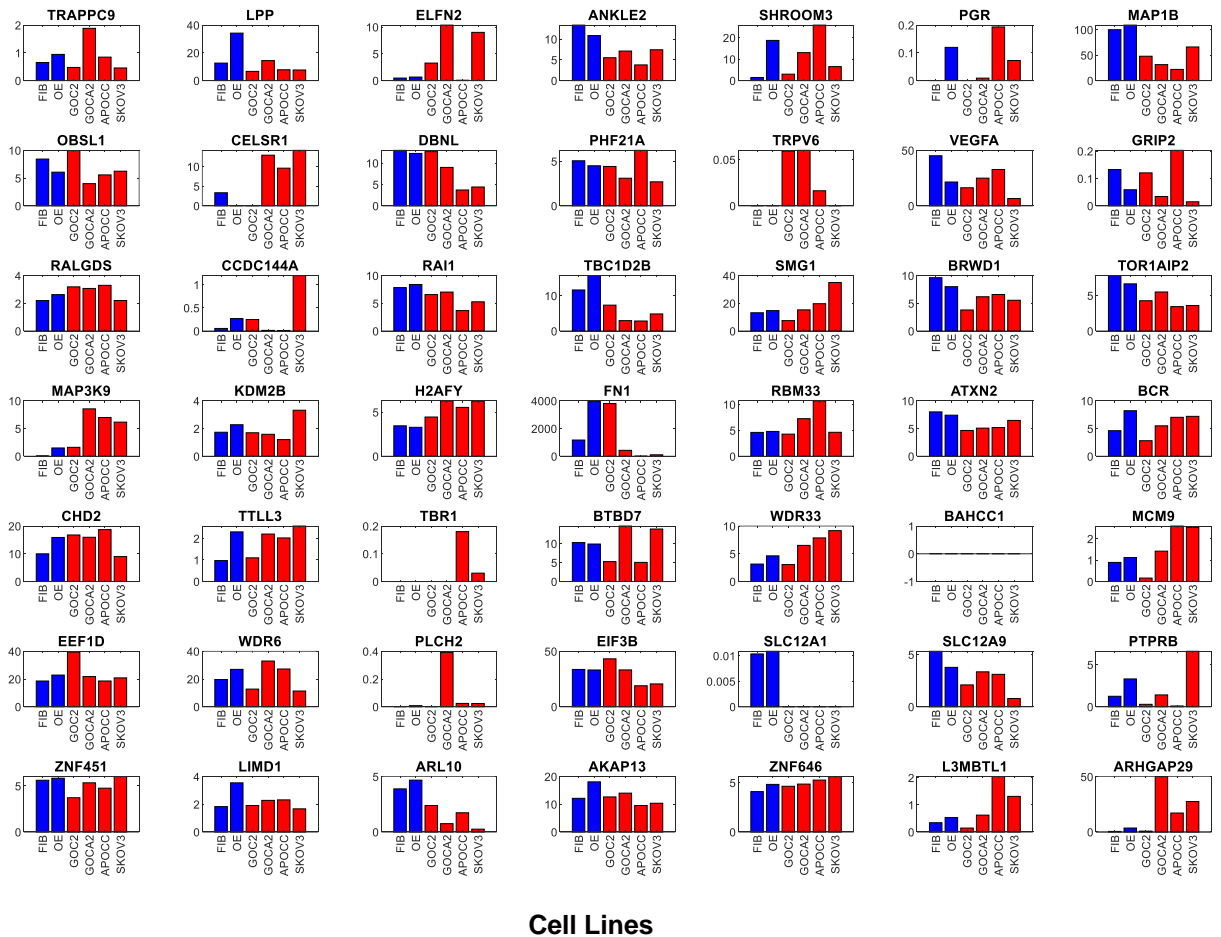

**Figure S2** : Expression of top 50 genes mutated less than expected in different cell lines. The x-axis for each bar plot shows the cells lines and the y-axis show the gene-length normalized expression values. A line through 0 indicates no detectable expression for any cell line. The non-cancer cells lines are colored blue and are OE (ovarian epithelial) and FIB (fibroblasts) The ovarian cancer cell lines are colored red and are GOC2, GOCA2, APOCC and SKOV3. Gene names of 49 of the top 50 non-mutated genes were found in the RNA-sequencing data.

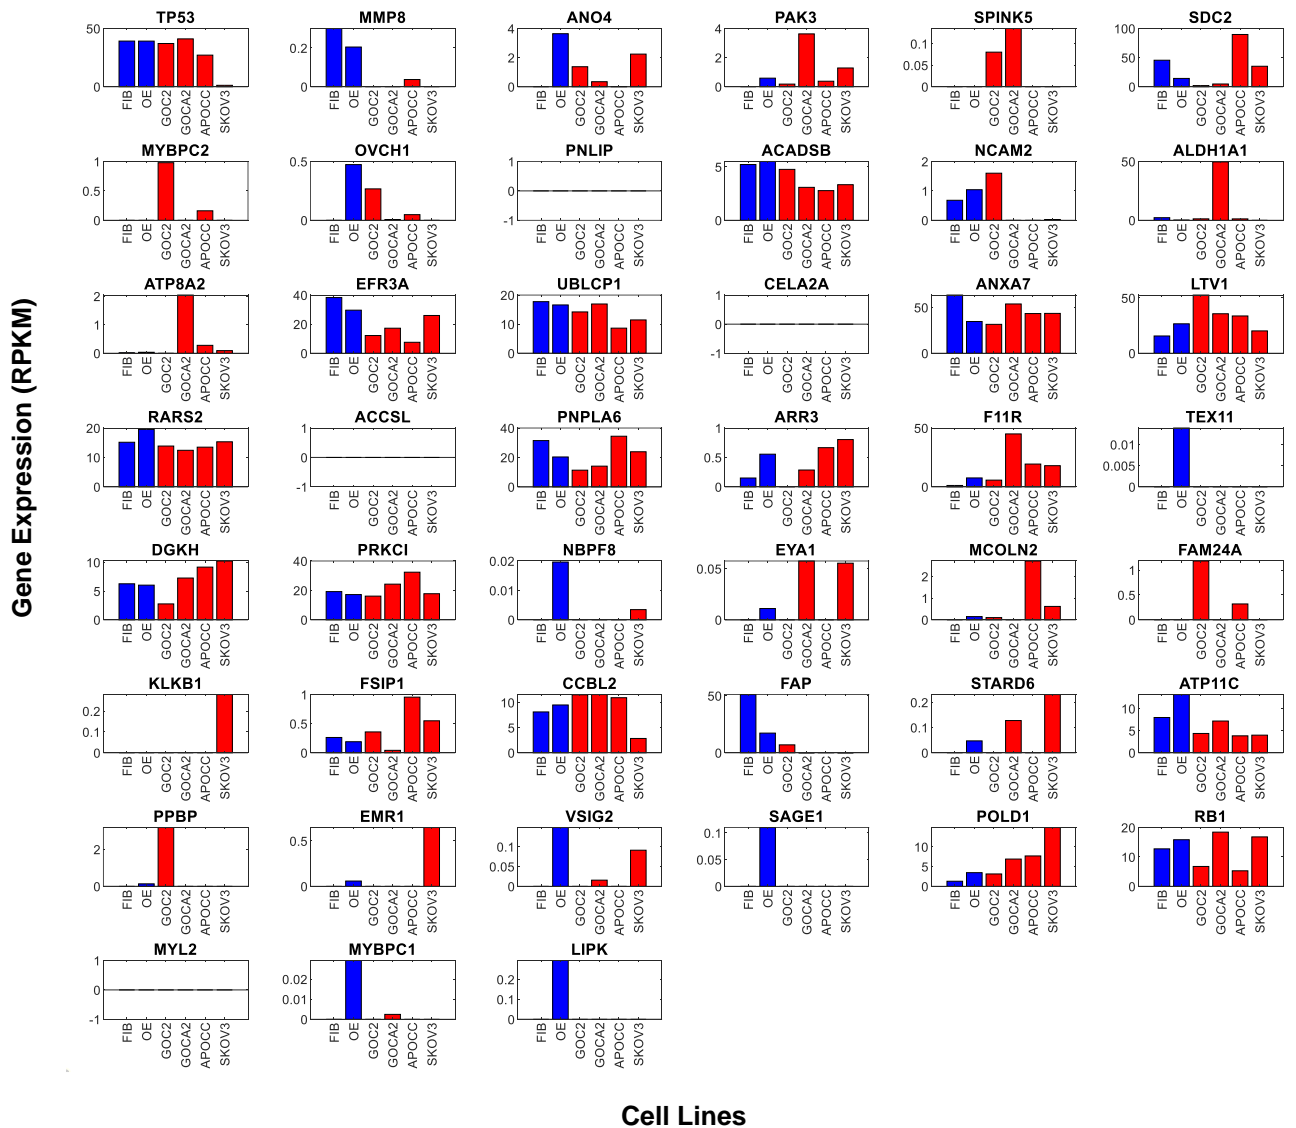

**Figure S3:** Expression of top 50 genes mutated more than expected in different cell lines. The x-axis for each bar plot shows the cell lines and the y-axis shows the gene-length normalized expression values. A line through 0 indicates no detectable expression for any cell line. The non-cancer cell lines are colored blue and are OE (ovarian epithelial) and FIB (fibroblasts). The ovarian cancer cell lines are colored red and are GOC2, GOCA2, APOCC and SKOV3. Gene names of 45 of the top 50 mutated genes were found in the RNA-sequencing data.

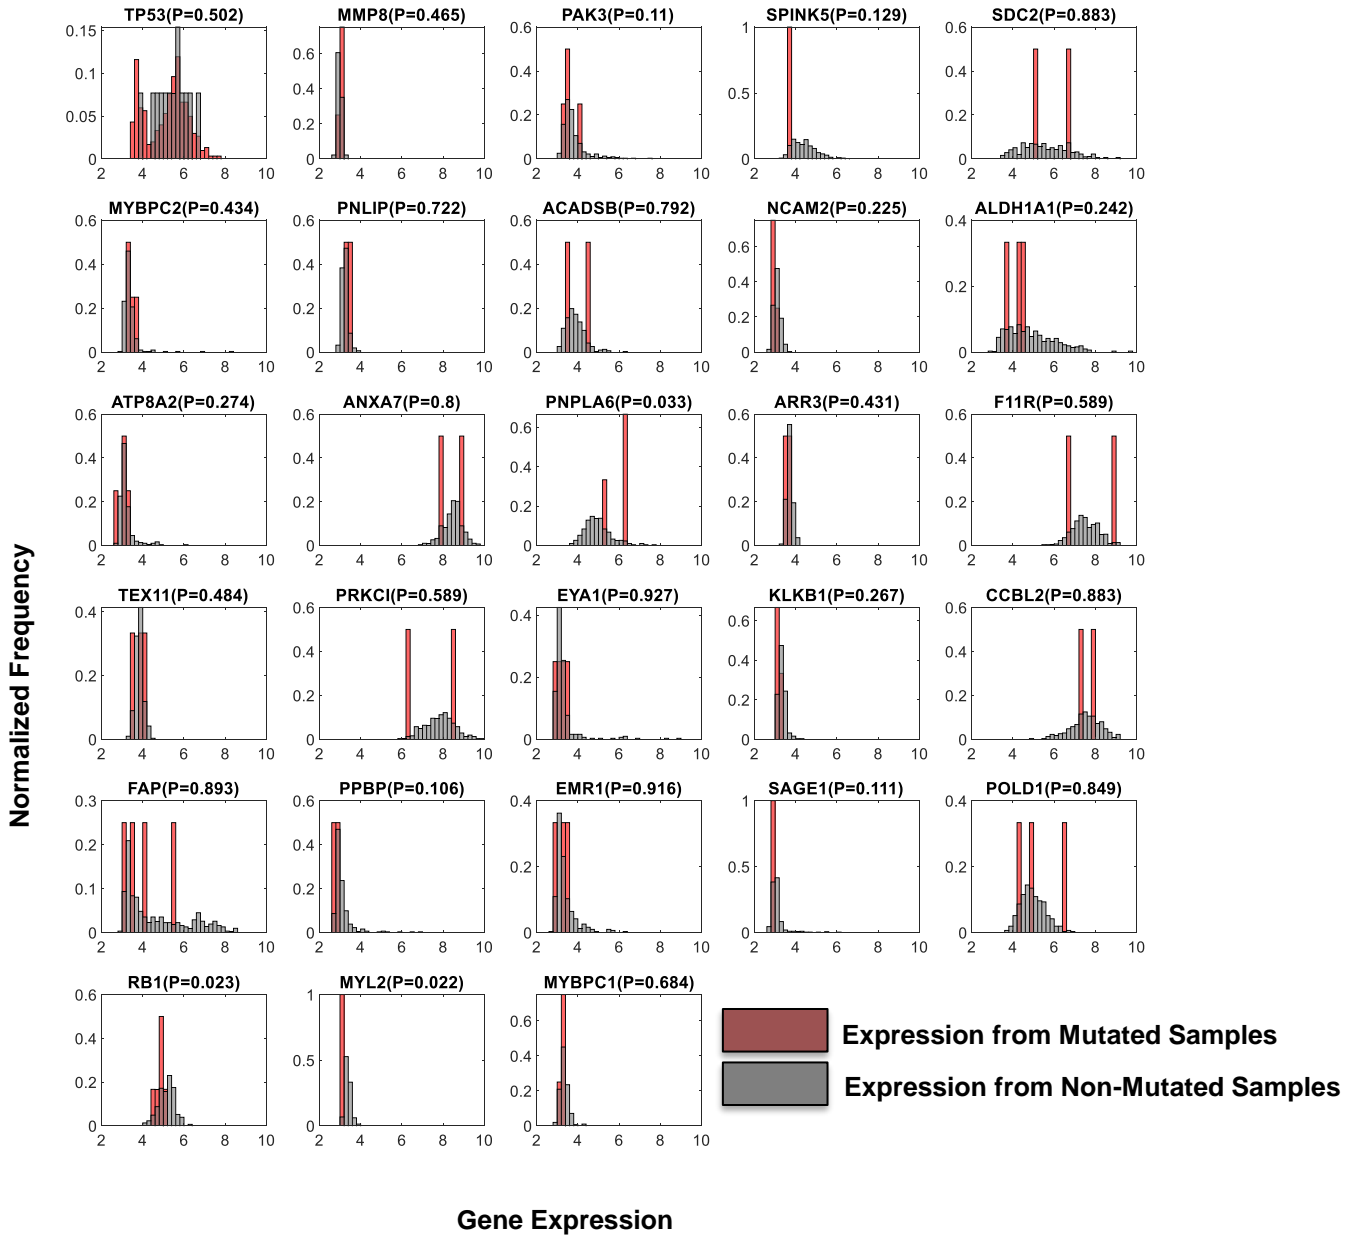

**Figure S4:** Gene-level expression distribution in TCGA-OV patients in mutated and non-mutated samples. This data is based on the TCGA data where both expression and mutation data is available for different genes. The x-axis for each histogram shows the gene expression from microarray data and the y-axis the frequency normalized to 1. The title shows the gene name and the p-value (P) from a two-sample Kolmogorov-Smirnov test of the expression values of mutated and non-mutated samples for the same gene.

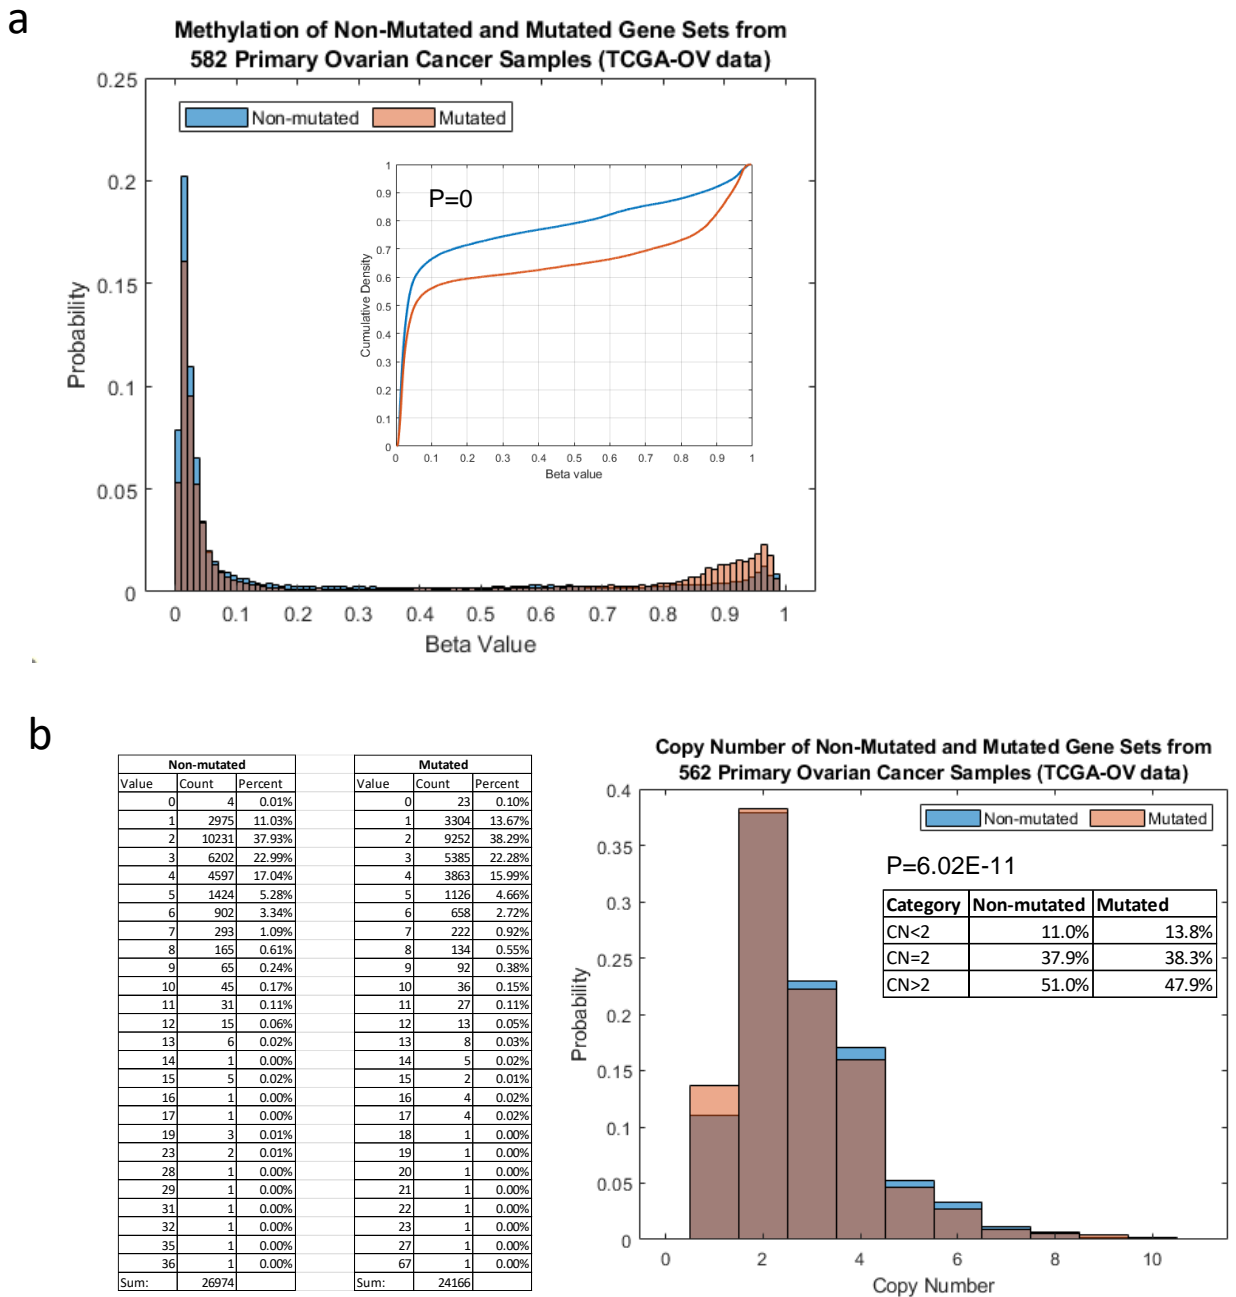

**Figure S5:** Methylation and copy number changes in primary ovarian tumor samples from the TCGA-OV project. a) Methylation beta value distributions in non-mutated (blue) and mutated (orange) samples. The inset shows the cumulative density plot of the same data with the p-value shown as P. In this case the p-value was 0 due to reaching the Matlab calculation limit. b) Aggregated copy number states are shown in the tables on the left for non-mutated and mutated genes and as a histogram on the right (limited at copy number =10). The histogram inset further shows copy number (CN) bins (CN less than 2, CN=2 and CN>2). The p-value is shown as P in the histogram on the right.

### Non-cancer Ovarian Epithelial Cells

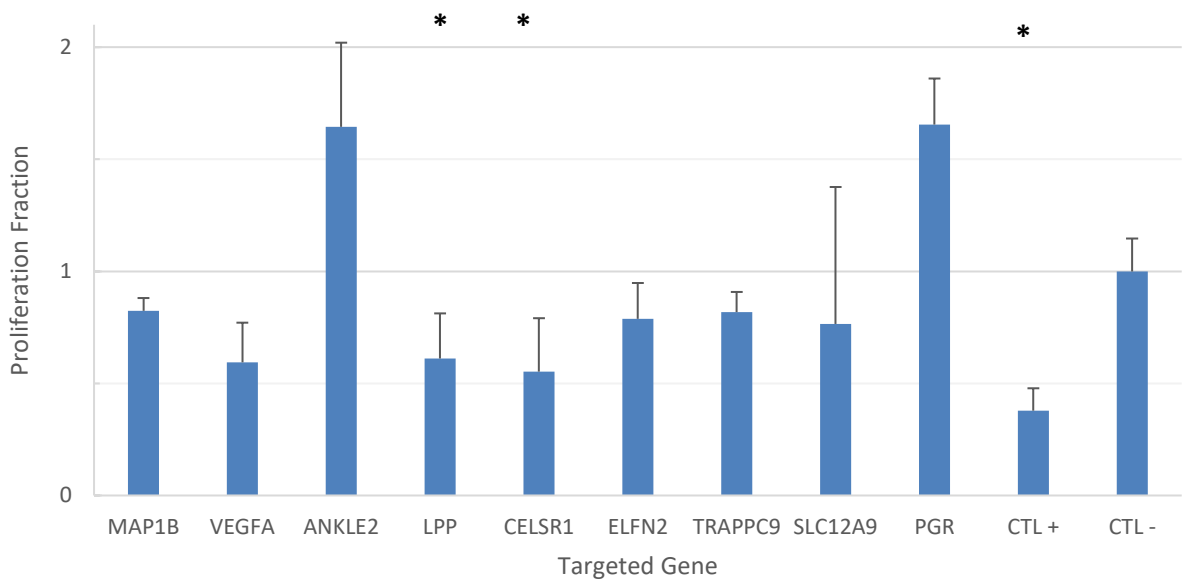

**Figure S6:** Cell viability relative to negative control of non-cancer ovarian epithelial cells. Asterisks denote significant differences between the targeted gene and the negative control ( $p$ -value < 0.05).

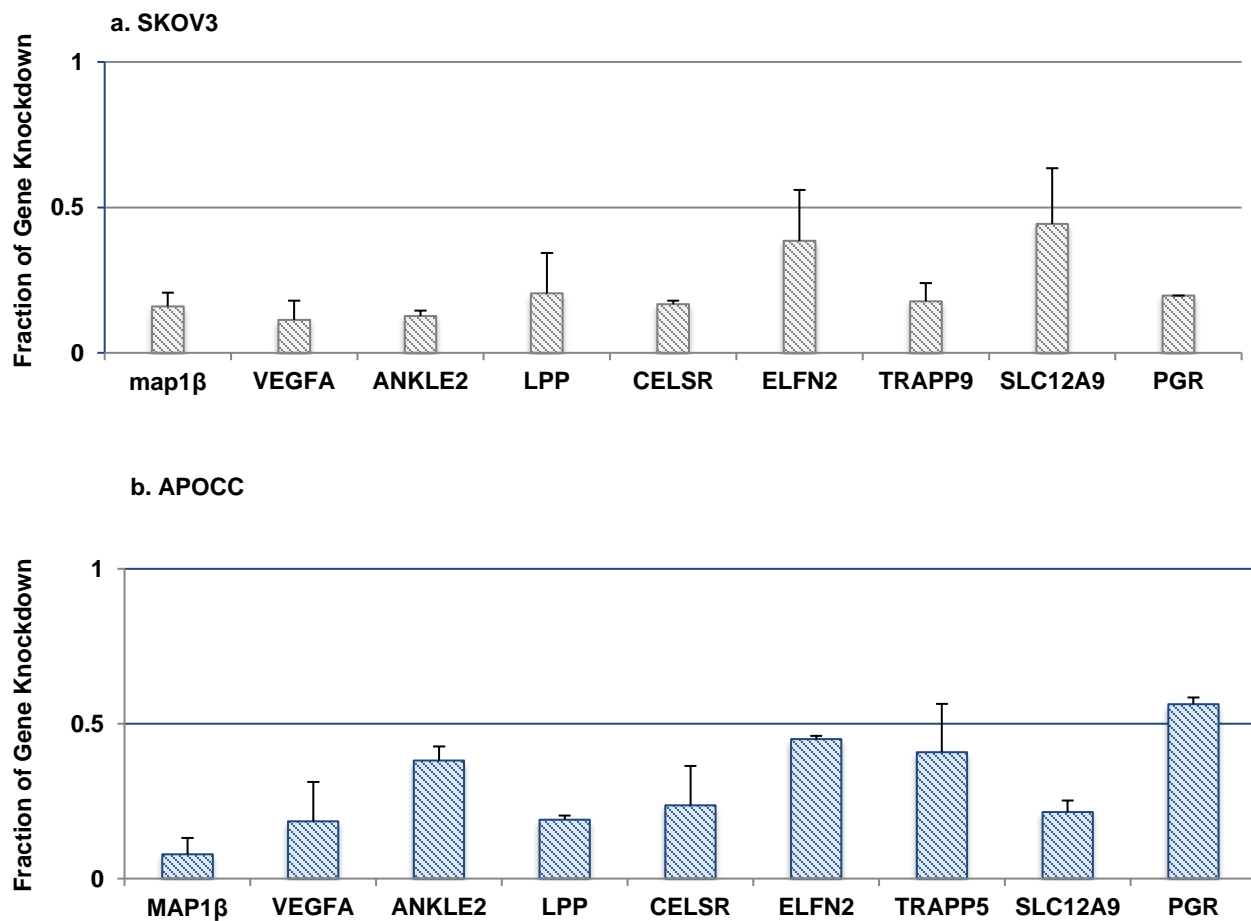

**Figure S7:** siRNAs Induced mRNA Knockdown with >50% Efficiency as Measured by TaqMan® Gene Expression Assays. (a) SKOV3 and (b) APOCC cells were transfected in 96-well plates with siRNAs (10 nM) with each of 9 different siRNAs. 72 hrs post-transfection, total RNA was isolated and converted to cDNA. Each siRNA was transfected in triplicate. Levels of mRNA remaining after siRNA treatment were assessed using qPCR with TaqMan® Gene Expression Assays. The error bar represents the standard deviation
